# Supplementary material for: Development of Lightweight and High-Performance Ballistic Helmet Based on Poly(Benzoxazine-co-Urethane) Matrix Reinforced with Aramid Fabric and Multi-Walled Carbon Nanotubes
Source: MDPI journal article supplement (doi:10.3390/polym12122897), 2020-12-03
Supplement: s1 [file s1]

10 plies of aramid fabric reinforced PBA/PU without MWCNT

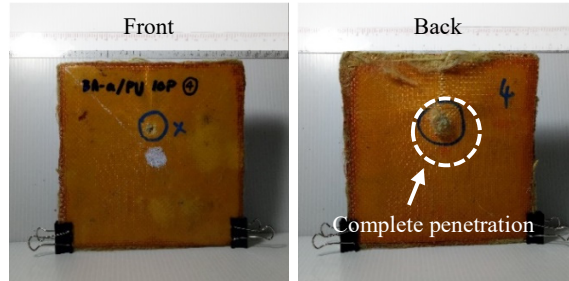

10 plies of aramid fabric reinforced PBA/PU filled with MWCNT

0.25wt% MWCNT

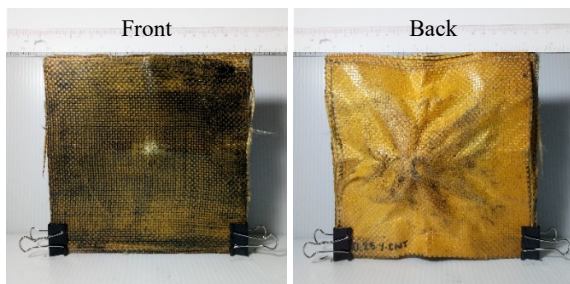

0.5wt% MWCNT

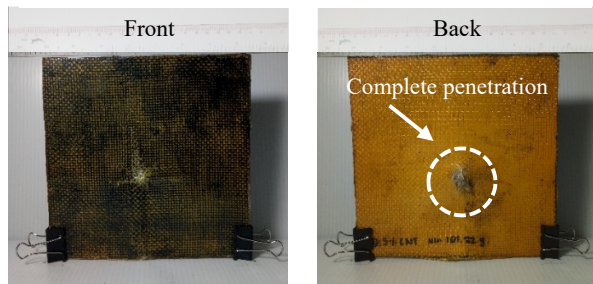

15 plies of aramid fabric reinforced PBA/PU filled with MWCNT

0.25wt% MWCNT

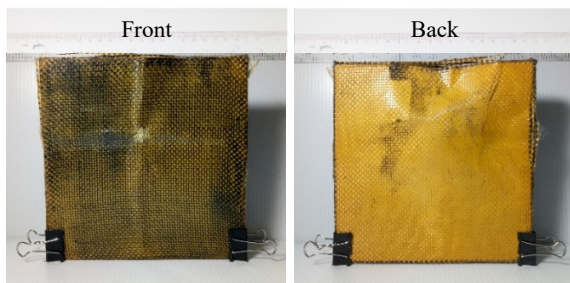

0.5wt% MWCNT

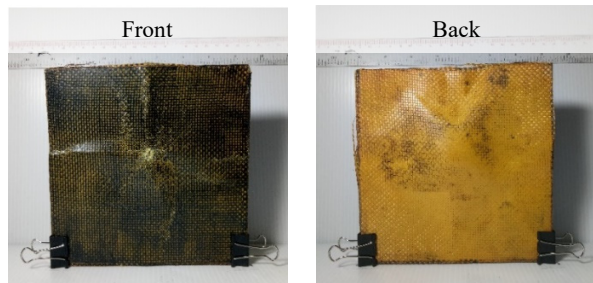

20 plies of aramid fabric reinforced PBA/PU filled with MWCNT

0.25wt% MWCNT

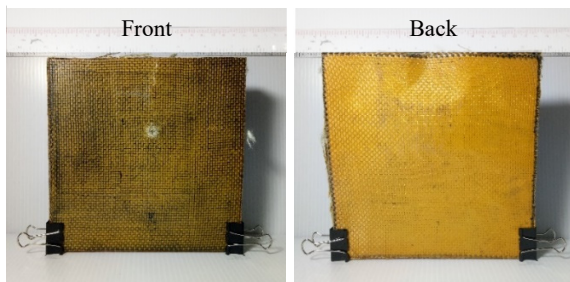

0.5wt% MWCNT

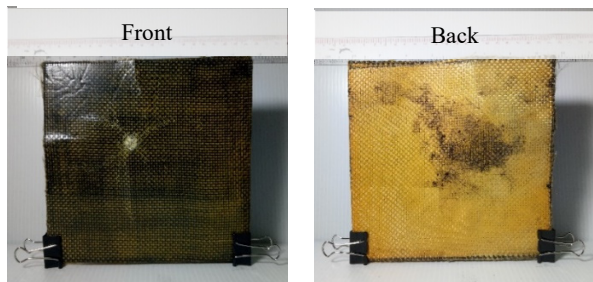

Figure S1: Ballistic impact of aramid fabric reinforced PBA/PU filled MWCNT specimens tested at level II according to NIJ-STD-0106.0
